# Supplementary material
Source: MDPI journal article supplement (https://www.mdpi.com/2227-9717/9/11/1864)
Supplement: s1 [file s1 › processes-1410464-supplementary.pdf]

# SUPPLEMENTARY DATA

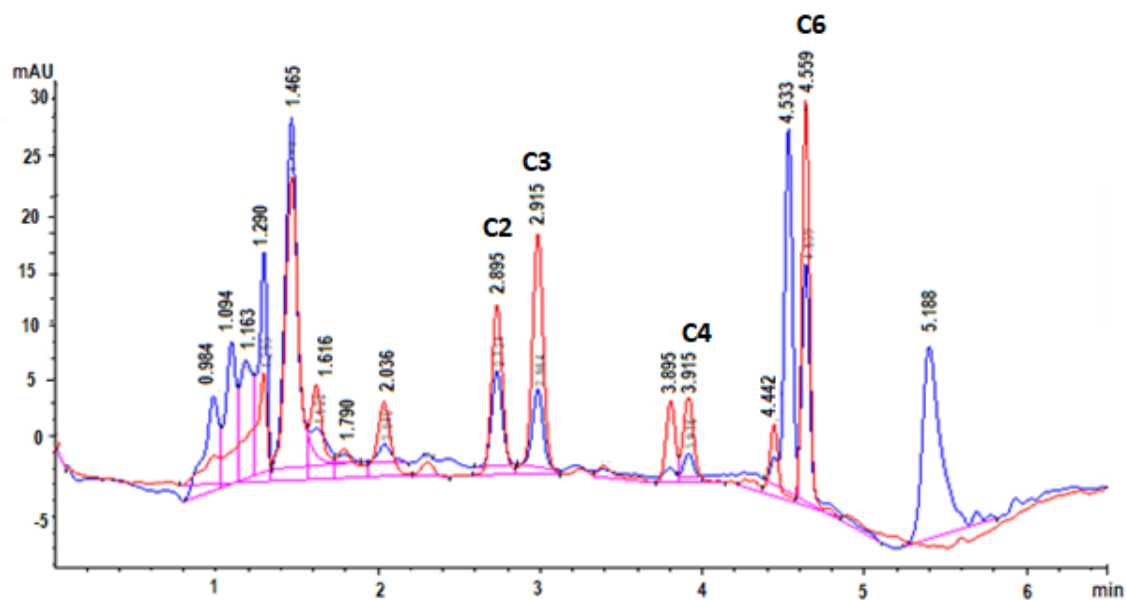

Figure S1: A chromatogram representing the separation of S1 using the validated method

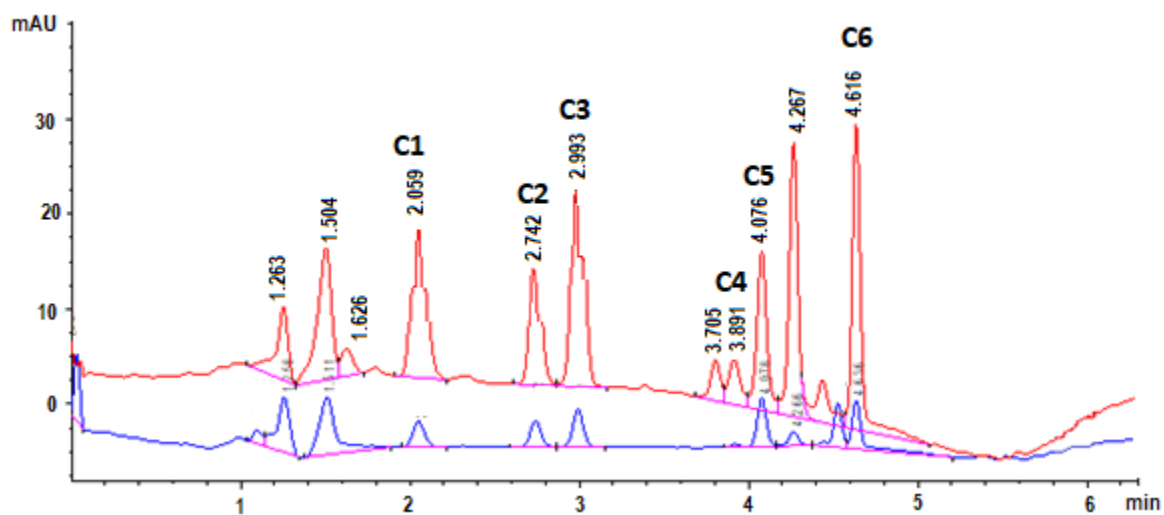

Figure S2: A chromatogram representing the separation of T1 using the validated method
